# Supplementary material
Source: publisher figshare collection journal article supplement (https://acs.figshare.com/ndownloader/files/14759498)
Supplement: Supplementary file 1 [file 14759498]

--- Supporting Information ---

# High-Resolution of Structural Water by $^{17}\text{O}$ NMR Spectroscopy

Eric G. Keeler,<sup>1,2,§</sup> Vladimir K. Michaelis,<sup>1,2,†</sup> Christopher B. Wilson,<sup>2,3,‡</sup> Ivan Hung<sup>4</sup>,  
Xiaoling Wang,<sup>4,‡</sup> Zhehong Gan<sup>4</sup>, and Robert G. Griffin<sup>1,2\*</sup>

<sup>1</sup>Department of Chemistry, <sup>2</sup>Francis Bitter Magnet Laboratory, and <sup>3</sup>Department of Physics, Massachusetts  
Institute of Technology, Cambridge, Massachusetts, 02139 USA

<sup>4</sup>National High Magnetic Field Laboratory, Florida State University, Tallahassee, Florida 32310, United  
States

<sup>§</sup>Current Address: Department of Chemistry, Columbia University, New York, New York, 10027 USA

<sup>†</sup>Current Address: Department of Chemistry, University of Alberta, Edmonton, Alberta, T6G 2G2 Canada

<sup>‡</sup>Current Address: Department of Physics, University of California, Santa Barbara, Santa Barbara,  
California, 93160 USA

\*Corresponding Author: Robert G. Griffin, [rgg@mit.edu](mailto:rgg@mit.edu)

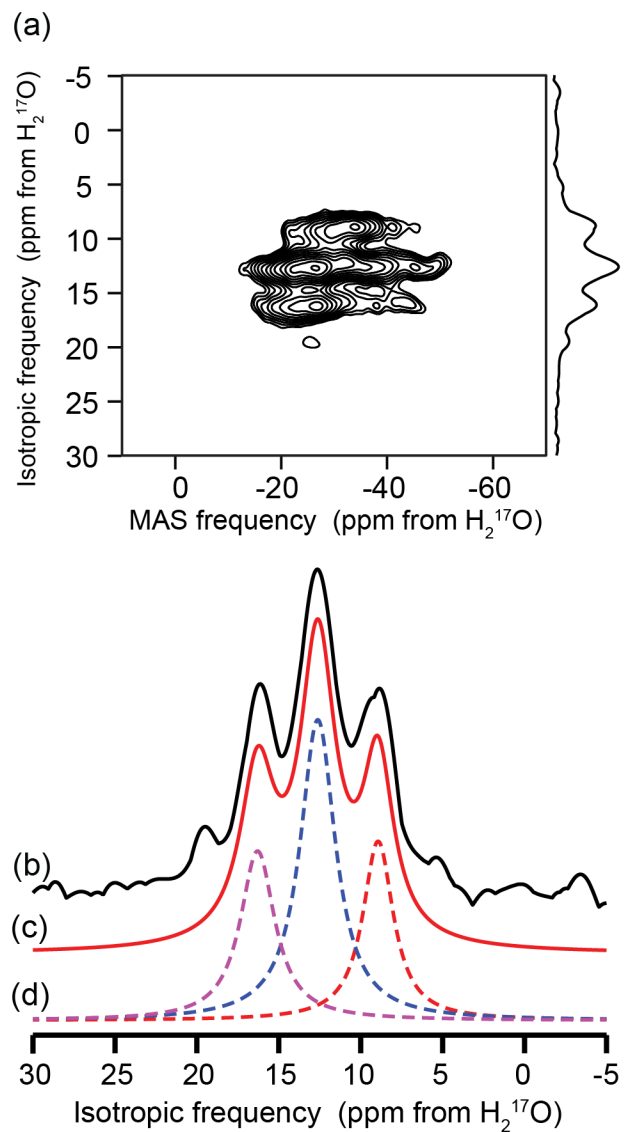

**Figure S1:** Experimental (a) <sup>17</sup>O 2D MQMAS spectrum, and experimental (b) and fit (c,d) isotropic projections of the <sup>17</sup>O 2D MQMAS spectrum at 21.1 T ( $\omega_{\text{OH}}/2\pi = 900$  MHz). Three distinct water environments are resolved with isotropic frequencies of  $8.9 \pm 1$ ,  $12.6 \pm 1$ , and  $16.3 \pm 1$  ppm. The Gaussian fits of each environment (c,d) indicate a ratio of populations of 1:2:1.

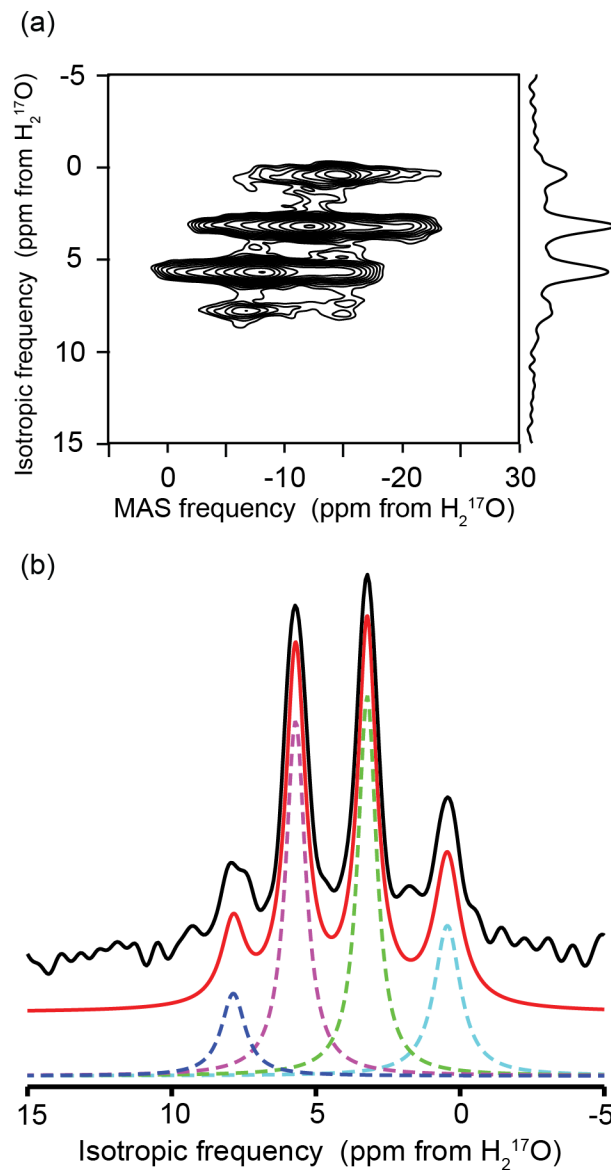

**Figure S2:** Experimental (a)  $^{17}\text{O}$  2D MQMAS spectrum, and experimental (b) and fit (c,d) isotropic projections of the  $^{17}\text{O}$  2D MQMAS spectrum at 35.2 T ( $\omega_{\text{OH}}/2\pi = 1500$  MHz). Four distinct water environments are resolved with isotropic frequencies of  $0.7 \pm 1$ ,  $3.4 \pm 1$ ,  $5.9 \pm 1$ , and  $8.1 \pm 1$  ppm.

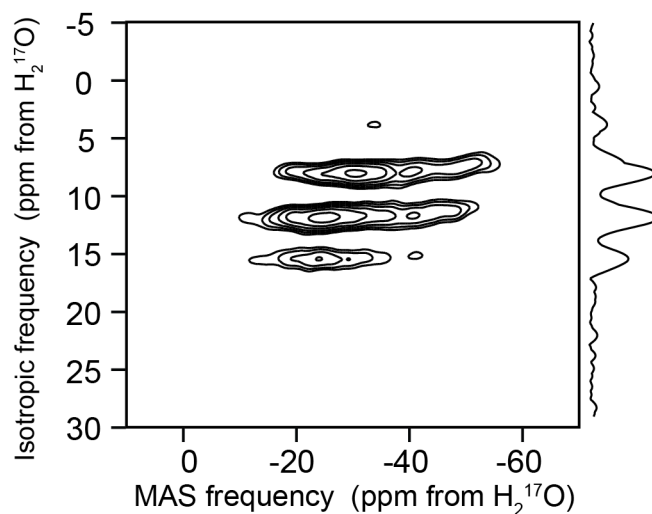

**Figure S3:** Oxygen-17 2D MQMAS NMR spectrum at 21.1 T ( $\omega_{\text{OH}}/2\pi = 900$  MHz) with  $\gamma B_1/2\pi = 100$  kHz continuous-wave  $^1\text{H}$  decoupling. Three distinct water environments are resolved.

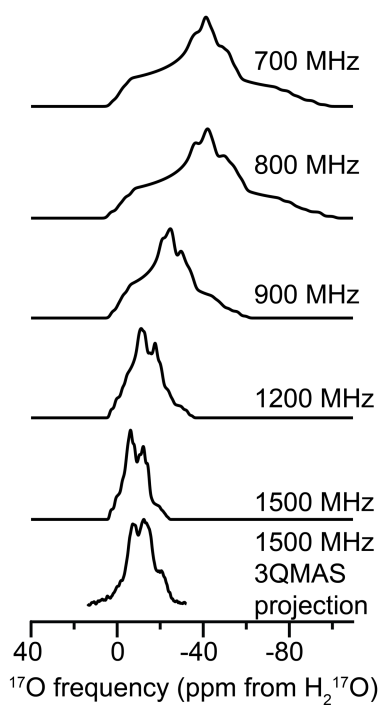

**Figure S4:** Simulated  $^{17}\text{O}$  MAS NMR spectra at 16.4 to 35.2 T (700 to 1500 MHz,  $^1\text{H}$ ) and the projection of the direct 3QMAS dimension.
